# Supplementary material
Source: PubMed Central journal article supplement (PMC3564604)
Supplement: f-69-00084-sup1.pdf [file f-69-00084-sup1.pdf]

**SUPPORTING INFORMATION FOR:**

**Crystal structure of ALD1, a plant-specific homologue of the universal  
diaminopimelate amino transferase enzyme of lysine biosynthesis**

Vladimir Sobolev<sup>1,3</sup>, Marvin Edelman<sup>1</sup>, Orly Dym<sup>2</sup>, Tamar Unger<sup>2</sup>, Shira Albeck<sup>2</sup>,  
Menny Kirma<sup>1</sup> and Gad Galili<sup>1,3</sup>

<sup>1</sup>Departments of Plant Sciences and <sup>2</sup>Israel Structural Proteomics Center (ISPC),  
Weizmann Institute of Science, Rehovot 76100, Israel

### Ald1 on GF HiLoad\_16/60 Superdex 200

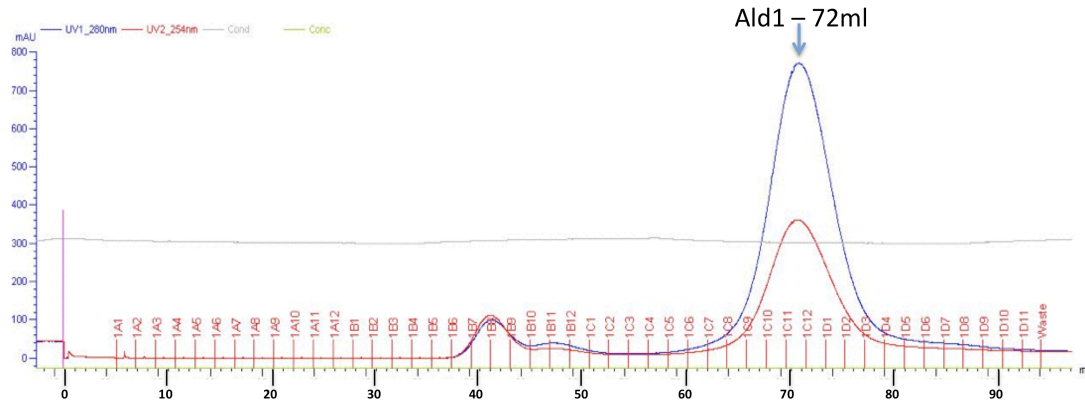

**Protein standards on this column:**

Aldolase 158kDa - 65.6ml

Albumin 67kDa - 74.2ml

Ovalbumin 43kDa - 80.6ml

72ml corresponds to a MW close to 100kDa which agrees to ALD1 dimer.

**Figure S1.** Gel-filtration data.

**Table S1a.** Residues in contact with PLP complexed to *AtALD1*

| -----   |     |         |                      |
|---------|-----|---------|----------------------|
| Residue |     | Dist, Å | Surf, Å <sup>2</sup> |
| -----   |     |         |                      |
| 141A    | GLY | 3.4     | 5.0                  |
| 142A    | ALA | 2.8     | 35.3                 |
| 143A    | GLN | 3.0     | 23.2                 |
| 166A    | PHE | 3.9     | 50.1                 |
| 219A    | CYS | 3.6     | 24.2                 |
| 223A    | ASN | 2.9     | 24.1                 |
| 251A    | ASP | 2.7     | 29.6                 |
| 253A    | ALA | 3.9     | 17.9                 |
| 254A    | TYR | 2.7     | 37.3                 |
| 281A    | SER | 2.6     | 37.7                 |
| 283A    | SER | 2.8     | 20.3                 |
| 284A    | LYS | 3.8     | 18.7                 |
| 292A    | ARG | 2.8     | 29.8                 |
| 108B    | TYR | 2.4     | 52.5                 |
| 323B    | ASN | 3.7     | 10.8                 |

-----  
Residues in contact with PLP belonging to chains A and B. Nearest atom-atom distances (Dist) and contact surface area (Surf) between PLP and the residues were defined using LPC software (<http://sgedg.weizmann.ac.il/lpc>).

**Table S1b.** Residues in contact with PLP in PDB entry 2Z20 (malate free)

| -----   |     |         |                      |
|---------|-----|---------|----------------------|
| Residue |     | Dist, Å | Surf, Å <sup>2</sup> |
| -----   |     |         |                      |
| 127A    | GLY | 3.2     | 8.3                  |
| 128A    | ALA | 2.8     | 40.7                 |
| 129A    | LYS | 3.0     | 44.0                 |
| 152A    | TYR | 3.7     | 44.5                 |
| 205A    | CYS | 3.8     | 15.5                 |
| 209A    | ASN | 2.7     | 52.4                 |
| 237A    | ASP | 2.8     | 33.4                 |
| 239A    | ALA | 4.3     | 8.7                  |
| 240A    | TYR | 3.4     | 19.5                 |
| 267A    | SER | 2.6     | 27.0                 |
| 269A    | SER | 2.7     | 24.6                 |
| 270A    | LYS | 3.2     | 35.8                 |
| 278A    | ARG | 3.0     | 27.4                 |
| 94B     | TYR | 3.4     | 14.8                 |
| 309B    | ASN | 2.8     | 27.9                 |

-----  
See legend to Table S1a

**Table S1c.** Residues in contact with PLP in PDB entry 2Z1Z (malate bound)

| Residue |     | Dist, Å | Surf, Å <sup>2</sup> |
|---------|-----|---------|----------------------|
| 127A    | GLY | 3.7     | 8.5                  |
| 128A    | ALA | 3.0     | 39.3                 |
| 129A    | LYS | 3.7     | 25.2                 |
| 152A    | TYR | 3.9     | 42.8                 |
| 205A    | CYS | 3.3     | 33.4                 |
| 209A    | ASN | 2.8     | 24.9                 |
| 237A    | ASP | 2.9     | 23.9                 |
| 239A    | ALA | 3.9     | 14.1                 |
| 240A    | TYR | 2.8     | 31.3                 |
| 267A    | SER | 2.4     | 37.4                 |
| 269A    | SER | 3.0     | 9.9                  |
| 270A    | LYS | 2.8     | 42.4                 |
| 278A    | ARG | 2.9     | 24.8                 |
| 94B     | TYR | 2.7     | 22.8                 |
| 309B    | ASN | 3.2     | 17.2                 |

See legend to Table S1a

**Table S2a.** Residues in contact with malate in PDB entry 2Z1Z

| Residue |     | Dist, Å | Surf, Å <sup>2</sup> |
|---------|-----|---------|----------------------|
| 39A     | PHE | 3.5     | 39.6                 |
| 63A     | ILE | 3.3     | 27.5                 |
| 64A     | GLY | 3.1     | 15.3                 |
| 129A    | LYS | 4.1     | 16.8                 |
| 152A    | TYR | 2.9     | 29.1                 |
| 209A    | ASN | 2.7     | 29.1                 |
| 270A    | LYS | 3.9     | 9.4                  |
| 404A    | ARG | 2.8     | 32.7                 |
| 94B     | TYR | 3.5     | 15.7                 |
| 309B    | ASN | 3.2     | 25.0                 |

Residues in contact with malate belonging to chains A and B. Nearest atom-atom distances (Dist) and contact surface area (Surf) between malate and the residues were defined using LPC software (<http://sgedg.weizmann.ac.il/lpc>).

**Table S2b.** Residues from the *At*ALD1 structure that would be in contact with malate if malate would be placed similar to its position in the *At*DAPAT structure

| Residue |     | Dist, Å | Surf, Å <sup>2</sup> |
|---------|-----|---------|----------------------|
| 53A     | PHE | 3.9     | 23.9                 |
| 78A     | GLY | 3.6     | 16.2                 |
| 166A    | PHE | 4.3     | 11.6                 |
| 223A    | ASN | 2.6     | 30.5                 |
| 284A    | LYS | 3.9     | 16.6                 |
| 418A    | ARG | 2.8     | 35.9                 |
| 108B    | TYR | 3.6     | 29.0                 |
| 323B    | ASN | 4.4     | 10.5                 |

See legend to Table S2a.
